# Supplementary material
Source: publisher figshare collection journal article supplement (https://sage.figshare.com/ndownloader/files/14652044)
Supplement: Supplementary file 1 [file 14652044]

| <b>Year</b> | <b>Author</b>                                                           | <b>Title</b>                                                                                                                                                          | <b>Type of Representation</b>    | <b>Type of Demographic Representation</b> |
|-------------|-------------------------------------------------------------------------|-----------------------------------------------------------------------------------------------------------------------------------------------------------------------|----------------------------------|-------------------------------------------|
| 2014        | Andrews, R., Ashworth, R., and Meier, J.K                               | <i>Representative Bureaucracy, and Fire Service Performance</i>                                                                                                       | Passive to Active Representation | Gender and Race/Ethnicity                 |
| 2005        | Andrews, R., Boyne, G. A., Meier, J.K., O'Toole, L. J. and Walker, R.M. | <i>Representative Bureaucracy, Organizational Strategy, and Public Service Performance: An Empirical Analysis of English Local Government</i>                         | Passive to Active Representation | Race/Ethnicity                            |
| 2013        | Atkins, D. N. and Wilkins, V. M                                         | <i>Going Beyond Reading, Writing, and Arithmetic: The Effects of Teacher Representation on Teen Pregnancy Rates</i>                                                   | Passive to Active Representation | Gender and Race/Ethnicity                 |
| 2006        | Bowling, C. J., Kelleher, A. C., Jones, J. and Wright, D.S.             | <i>Cracked Ceilings, Firmer Floors, and Weakening Walls: Trends and Patterns in Gender Representation among Executives Leading American State Agencies, 1970-2000</i> | Passive to Active Representation | Gender                                    |
| 2000        | Brudney, J. L., Hebert, F.T. and Wright, D. S.                          | <i>From Organizational Values to Organizational Roles: Examining Representative Bureaucracy in State Administration</i>                                               | Passive to Active Representation | Gender and Race/Ethnicity                 |
| 2008        | Bradbury, M. D. and Kellough, J. E.                                     | <i>Representative Bureaucracy: Exploring the Potential for Active Representation in Local Government</i>                                                              | Passive to Active Representation | Race/Ethnicity                            |
| 1980        | Burns, J. P.                                                            | <i>Representative Bureaucracy and The Senior Civil Service in Hong Kong</i>                                                                                           | Passive Representation           | Gender                                    |
| 2017        | Carroll, K.                                                             | <i>Ambition Is Priceless Socialization, Ambition, and Representative Bureaucracy.</i>                                                                                 | Passive to Active Representation | Race/Ethnicity                            |

|       |                                                |                                                                                                                                |                                  |                                |
|-------|------------------------------------------------|--------------------------------------------------------------------------------------------------------------------------------|----------------------------------|--------------------------------|
| 1998  | Coleman, S., Brudney, J. L., & Kellough, J. E. | <i>Bureaucracy as a representative institution: Toward a reconciliation of bureaucratic government and democratic theory.</i>  | Passive to Active Representation | Race/Ethnicity                 |
| 1985  | Daley, D.                                      | <i>Administrative Responsibility and Control of the Bureaucracy: The Dog That Did Not Bite</i>                                 | Passive to Active Representation | Gender and Race/Ethnicity      |
| 1990  | Dauda, B.                                      | <i>Fallacies and Dilemmas: The Theory of Representative Bureaucracy with a Particular reference to Nigerian Public Service</i> | Passive Representation           | Other [Spatial Representation] |
| 2004  | Dee, T.                                        | <i>Teachers, Race and Student Achievement in a Randomized Experiment</i>                                                       | Passive to Active Representation | Race/Ethnicity                 |
| 2005  | Dee, T.                                        | <i>A Teacher like Me: Does Race, Ethnicity, or Gender Matter?</i>                                                              | Passive to Active Representation | Gender and Race/Ethnicity      |
| 2007  | Dee, T.                                        | <i>Teachers and the Gender Gaps in Student Achievement</i>                                                                     | Passive to Active Representation | Gender                         |
| 2000  | Dolan, J.                                      | <i>The Senior Executive Service: Gender, Attitudes, and Representative Bureaucracy</i>                                         | Passive to Active Representation | Gender                         |
| 2002a | Dolan, J.                                      | <i>Representative Bureaucracy in the Federal Executive: Gender and Spending Priorities</i>                                     | Passive to Active Representation | Gender                         |
| 2002b | Dolan, J.                                      | <i>The budget-minimizing bureaucrat? Empirical evidence from the senior executive service</i>                                  | Other [unspecified]              | Other [unspecified]            |
| 1984  | Dometrius, N. C.                               | <i>Minorities and Women Among State Agency Leaders</i>                                                                         | Passive Representation           | Gender and Race/Ethnicity      |
| 1984  | Dometrius, N. C. and Sigelman, L.              | <i>Assessing Progress toward Affirmative Action Goals in State and Local Government: A New Benchmark</i>                       | Passive Representation           | Gender and Race/Ethnicity      |

|      |                                                                |                                                                                                                                 |                                  |                     |
|------|----------------------------------------------------------------|---------------------------------------------------------------------------------------------------------------------------------|----------------------------------|---------------------|
| 1974 | Dresang, D. L.                                                 | <i>Ethnic Politics, Representative Bureaucracy and Development Administration: The Zambian Case</i>                             | Passive to Active Representation | Race/Ethnicity      |
| 1982 | Eisinger, P.K.                                                 | <i>Black Employment in Municipal Jobs: The Impact of Black Political Power</i>                                                  | Passive to Active Representation | Race/Ethnicity      |
| 1999 | Esman, M.J.                                                    | <i>Public administration and conflict management in plural societies: the case for representative bureaucracy</i>               | Passive to Active Representation | Race/Ethnicity      |
| 1997 | Gidengil, E. and Vengroff, R.                                  | <i>Representative bureaucracy, vengyo. tokenism and the glass ceiling: the case of women in Quebec municipal administration</i> | Passive Representation           | Gender              |
| 2008 | Gravier, M.                                                    | <i>The 2004 Enlargement Staff Policy of the European Commission: The Case for Representative Bureaucracy</i>                    | Passive Representation           | Country of Origin   |
| 2011 | Grissom, J. A. and Keiser, L. R.                               | <i>A Supervisor Like Me: Race, Representation, and the Satisfaction and Turnover Decisions of Public Sector Employees</i>       | Passive to Active Representation | Race/Ethnicity      |
| 2012 | Grissom, J. A., Nicholson-Crotty, J. and Keiser, L.            | <i>Does My Boss's Gender Matter? Explaining Job Satisfaction and Employee Turnover in the Public Sector</i>                     | Passive to Active Representation | Gender              |
| 2009 | Grissom, J. A., Nicholson-Crotty, J., and Nicholson-Crotty, S. | <i>Race, Region, and Representative Bureaucracy</i>                                                                             | Passive to Active Representation | Race/Ethnicity      |
| 2010 | Groeneveld, S. and Vand de Walle, S.                           | <i>A contingency approach to representative bureaucracy: power, equal opportunities and diversity</i>                           | Other [unspecified]              | Other [unspecified] |

|      |                                                             |                                                                                                                      |                                  |                                 |
|------|-------------------------------------------------------------|----------------------------------------------------------------------------------------------------------------------|----------------------------------|---------------------------------|
| 1996 | Guajardo, S.                                                | <i>Representative Bureaucracy: An Estimation of the Reliability and Validity of the Nachmias-Rosenbloom MV Index</i> | Other [unspecified]              | Gender and Race/Ethnicity       |
| 2018 | Guul, T. S.                                                 | <i>The Individual-Level Effect of Gender Matching in Representative Bureaucracy</i>                                  | Passive to Active Representation | Gender                          |
| 1978 | Henderson, L. J.                                            | <i>Administrative Advocacy and Black Urban Administrators</i>                                                        | Passive to Active Representation | Race/Ethnicity                  |
| 1993 | Hindera, J.J.                                               | <i>Representative Bureaucracy: Further Evidence of Active Representation in the EEOC District Offices</i>            | Passive to Active Representation | Race/Ethnicity                  |
| 1993 | Hindera, J.J.                                               | <i>Representative Bureaucracy: Imprimis Evidence of Active Representation in the EEOC District Offices</i>           | Passive to Active Representation | Gender and Race/Ethnicity       |
| 1998 | Hindera, J.J. and Young, C.D.                               | <i>Representative Bureaucracy: The Theoretical Implications of Statistical Interaction</i>                           | Passive to Active Representation | Race/Ethnicity                  |
| 2009 | Jamila, I. and Dangalb, R.                                  | <i>The state of bureaucratic representativeness and administrative culture in Nepal</i>                              | Passive Representation           | Other [gender, religion, caste] |
| 2002 | Keiser, L. R., Wilkins, V.M., Meier, K.J. and Holland, C.A. | <i>Lipstick and Logarithms: Gender, Institutional Context, and Representative Bureaucracy</i>                        | Passive to Active Representation | Gender                          |
| 1990 | Kellough, J. E.                                             | <i>Integration in the Public Workplace: Determinants of Minority and Female Employment in Federal Agencies</i>       | Passive Representation           | Gender and Race/Ethnicity       |
| 1998 | Kelly, R.M.                                                 | <i>An Inclusive Democratic Polity, Representative Bureaucracies, and the New Public Management</i>                   | Other [unspecified]              | Other [unspecified]             |

|      |                               |                                                                                                            |                                  |                           |
|------|-------------------------------|------------------------------------------------------------------------------------------------------------|----------------------------------|---------------------------|
| 2001 | Kelly, R.M. and Newman, M.    | <i>The Gendered Bureaucracy: Agency Mission, Equality of Opportunity, and Representative Bureaucracies</i> | Passive to Active Representation | Gender                    |
| 2013 | Kennedy, B.A.                 | <i>Sorting Through: The Role of Representation in Bureaucracy</i>                                          | Passive to Active Representation | Gender and Race/Ethnicity |
| 2012 | Kennedy, B.                   | <i>Unraveling Representative Bureaucracy: A Systematic Analysis of the Literature</i>                      | Other [unspecified]              | Other [unspecified]       |
| 1978 | Kernaghan, K.                 | <i>Representative Bureaucracy: the Canadian Perspective</i>                                                | Passive to Active Representation | Other [unspecified]       |
| 1993 | Kim, S.P.                     | <i>Public Bureaucracy and Regionalism in South Korea</i>                                                   | Other [unspecified]              | Race/Ethnicity            |
| 2009 | LeRoux, K.                    | <i>The Effects of Descriptive Representation on Nonprofits' Civic Intermediary Roles</i>                   | Passive to Active Representation | Race/Ethnicity            |
| 1989 | Lewis, G. W.                  | <i>Toward Representative Bureaucracy: Blacks in City Police Organizations</i>                              | Passive Representation           | Race/Ethnicity            |
| 2015 | Marvel, D. J. and Resh, W.G.  | <i>Bureaucratic Discretion, Client Demographics, and Representative Bureaucracy</i>                        | Passive to Active Representation | Race/Ethnicity            |
| 2018 | Meier, K.J.                   | <i>Theoretical Frontiers in Representative Bureaucracy: New Directions for Research</i>                    | Other [unspecified]              | Other [unspecified]       |
| 1993 | Meier, K.J.                   | <i>Latinos and Representative Bureaucracy Testing the Thompson and Henderson Hypotheses</i>                | Passive to Active Representation | Race/Ethnicity            |
| 2001 | Meier, K.J. and Bohte, J.     | <i>Structure and Discretion: Missing Links in Representative Bureaucracy</i>                               | Passive to Active Representation | Race/Ethnicity            |
| 1984 | Meier, K.J. and England, R.E. | <i>Black Representation and Educational Policy: Are They Related?</i>                                      | Passive to Active Representation | Race/Ethnicity            |

|      |                                                   |                                                                                                                                |                                  |                           |
|------|---------------------------------------------------|--------------------------------------------------------------------------------------------------------------------------------|----------------------------------|---------------------------|
| 2017 | Meier, K.J. and Funk, K.                          | <i>Women and Public Administration in a Comparative Perspective: The Case of Representation in Brazilian Local Governments</i> | Passive to Active Representation | Gender                    |
| 2006 | Meier, K.J. and Nicholson-Crotty, J.              | <i>Gender, Representative Bureaucracy, and Law Enforcement: The Case of Sexual Assault</i>                                     | Passive to Active Representation | Gender                    |
| 1976 | Meier, K.J. and Nigro, L.G.                       | <i>Representative Bureaucracy and Policy Preferences: A Study in the Attitudes of Federal Executives</i>                       | Passive to Active Representation | Gender and Race/Ethnicity |
| 2006 | Meier, K.J. and O'Toole, L.J.                     | <i>Political Control versus Bureaucratic Values: Reframing the Debate</i>                                                      | Passive to Active Representation | Race/Ethnicity            |
| 2005 | Meier, K.J. and Pennington, M.S., and Eller, W.S. | <i>Race, Sex, and Clarence Thomas: Representation Change in the EEOC</i>                                                       | Passive to Active Representation | Gender and Race/Ethnicity |
| 1995 | Meier, K.J. and Smith, K.B.                       | <i>Representative Democracy and Representative Bureaucracy: Examining the Top-Down and Bottom-Up Linkages</i>                  | Passive to Active Representation | Race/Ethnicity            |
| 1992 | Meier, K.J. and Stewart, J.                       | <i>The Impact of Representative Bureaucracies: Educational Systems and Public Policies</i>                                     | Passive to Active Representation | Race/Ethnicity            |
| 2016 | Moldovan, O.                                      | <i>Representative Bureaucracy in Romania? Gender and Leadership in Central Public Administration</i>                           | Passive Representation           | Gender                    |
| 2016 | Molina, A. L.                                     | <i>A Manager is a Manager is a Manager? Race and Managerial Impact on Organizational Performance</i>                           | Passive to Active Representation | Race/Ethnicity            |
| 1973 | Nachmias, D. and Rosenbloom, D.H.                 | <i>Measuring Bureaucratic Representation and Integration</i>                                                                   | Passive Representation           | Race/Ethnicity            |
| 1998 | Naff, K.C.                                        | <i>Progress toward achieving a representative federal bureaucracy: the impact of supervisors and their beliefs</i>             | Passive to Active Representation | Race/Ethnicity            |

|      |                                                              |                                                                                                                                |                                  |                           |
|------|--------------------------------------------------------------|--------------------------------------------------------------------------------------------------------------------------------|----------------------------------|---------------------------|
| 2014 | Naff, K.C. and Capers, k.J.                                  | <i>The Complexity of Descriptive Representation and Bureaucracy: The Case of South Africa</i>                                  | Passive Representation           | Gender and Race/Ethnicity |
| 2011 | Nicholson-Crotty, J., Grissom, J.A. and Nicholson-Crotty, S. | <i>Bureaucratic Representation, Distributional Equity, and Democratic Values in the Administration of Public Programs</i>      | Passive to Active Representation | Race/Ethnicity            |
| 2017 | Nicholson-Crotty, S., Nicholson-Crotty, J. and Fernandez, S. | <i>Will More Black Cops Matter? Officer Race and Police-Involved Homicides of Black Citizens</i>                               | Passive to Active Representation | Race/Ethnicity            |
| 2012 | Park, S.                                                     | <i>Does Gender Matter? The Effect of Gender Representation of Public Bureaucracy on Governmental Performance</i>               | Passive to Active Representation | Gender                    |
| 2005 | Pitts, D.W.                                                  | <i>Diversity, Representation, and Performance: Evidence about Race and Ethnicity in Public Organizations</i>                   | Passive to Active Representation | Race/Ethnicity            |
| 2007 | Pitts, D.W.                                                  | <i>Representative Bureaucracy, Ethnicity, and Public Schools<br/>Examining the Link Between Representation and Performance</i> | Passive to Active Representation | Race/Ethnicity            |
| 1986 | Rehfuss, J.A.                                                | <i>A Representative Bureaucracy? Women and Minority Executives in California Career Service</i>                                | Passive to Active Representation | Gender                    |
| 2004 | Riccucci, N.M. and Meyers, M.K.                              | <i>Linking Passive and Active Representation: The Case of Frontline Workers in Welfare Agencies</i>                            | Passive to Active Representation | Race/Ethnicity            |
| 1997 | Riccucci, N.M. and Saidel, J.R.                              | <i>The Representativeness of State-Level Bureaucratic Leaders: A Missing Piece of the Representative Bureaucracy Puzzle</i>    | Passive Representation           | Gender and Race/Ethnicity |

|      |                                                  |                                                                                                                                     |                                  |                |
|------|--------------------------------------------------|-------------------------------------------------------------------------------------------------------------------------------------|----------------------------------|----------------|
| 2014 | Riccucci, N.M., Van Ryzin, G.G. and Lavena, C.F. | <i>Representative Bureaucracy in Policing: Does It Increase Perceived Legitimacy?</i>                                               | Symbolic Representation          | Gender         |
| 2016 | Riccucci, N.M., Van Ryzin, G.G. and Li, H.       | <i>Representative Bureaucracy and the Willingness to Coproduce: An Experimental Study</i>                                           | Symbolic Representation          | Gender         |
| 2012 | Roch, C.H. and Pitts, D.                         | <i>Differing Effects of Representative Bureaucracy in Charter Schools and Traditional Public Schools</i>                            | Passive to Active Representation | Race/Ethnicity |
| 2010 | Roch, C.H. and Pitts, D. and Navarro, I.         | <i>Representative Bureaucracy and Policy Tools: Ethnicity, Student Discipline, and Representation in Public Schools</i>             | Passive to Active Representation | Race/Ethnicity |
| 2009 | Rocha, R.R and Hawes, D.P.                       | <i>Racial Diversity, Representative Bureaucracy, and Equity in Multiracial School Districts</i>                                     | Passive to Active Representation | Race/Ethnicity |
| 1982 | Romzek, B.S. and Hendricks, J.S.                 | <i>Organizational Involvement and Representative Bureaucracy: Can We Have It Both Ways?</i>                                         | Passive to Active Representation | Race/Ethnicity |
| 1977 | Rosenbloom, D.H. and Featherstonhaugh, J.G.      | <i>Passive to Active Representation in the Federal Service: A Comparison of Blacks and Whites</i>                                   | Passive to Active Representation | Race/Ethnicity |
| 1997 | Selden, S. C.                                    | <i>Representative Bureaucracy Examining the Linkage Between Passive to Active Representation in the Farmers Home Administration</i> | Passive to Active Representation | Race/Ethnicity |
| 2010 | Smith, C.R. and Fernandez, S.                    | <i>Equity in Federal Contracting: Examining the Link between Minority Representation and Federal Procurement Decisions</i>          | Passive to Active Representation | Race/Ethnicity |
| 2013 | Smith, A.E. and Monaghan, K.R.                   | <i>Some Ceilings Have More Cracks: Representative Bureaucracy in Federal Regulatory Agencies</i>                                    | Passive to Active Representation | Gender         |



|      |                                                                                       |                                                                                                                      |                                  |                                      |
|------|---------------------------------------------------------------------------------------|----------------------------------------------------------------------------------------------------------------------|----------------------------------|--------------------------------------|
| 1980 | Smith, R. L.                                                                          | <i>Representative Bureaucracy: A Research Note on Demographic Representation in State Bureaucracies</i>              | Passive Representation           | Race/Ethnicity                       |
| 2016 | Song, M.                                                                              | <i>Gender Representation and Student Performance: Representative Bureaucracy Goes to Korea</i>                       | Passive to Active Representation | Gender                               |
| 2003 | Sowa, J.E. and Seldon, S.C.                                                           | <i>Administrative Discretion and Active Representation: An Expansion of the Theory of Representative Bureaucracy</i> | Passive to Active Representation | Race/Ethnicity                       |
| 2016 | Stearns, E. Bottia, M. C., Davalos, E., Mickelson, R.A., Moller, S. and Valentino, L. | <i>Demographic Characteristics of High School Math and Science Teachers and Girls' Success in STEM</i>               | Passive to Active Representation | Gender and Race/Ethnicity            |
| 2009 | Stevens, A.                                                                           | <i>Representative Bureaucracy – What, Why and How? Evidence from the European Commission</i>                         | Other [unspecified]              | Other [unspecified]                  |
| 2009 | Theobald, N.A. and Haider-Markel, D.P.                                                | <i>Race, Bureaucracy, and Symbolic Representation: Interactions between Citizens and Police</i>                      | Symbolic Representation          | Race/Ethnicity                       |
| 2006 | Timpson, A. M.                                                                        | <i>Stretching the concept of representative bureaucracy: the case of Nunavut</i>                                     | Passive Representation           | Race/Ethnicity                       |
| 1983 | Uslaner, E.M. and Weber, R.E.                                                         | <i>Policy Congruence and American State Elites: Descriptive Representation versus Electoral Accountability</i>       | Passive Representation           | Intersectional (Multiple Identities) |
| 2011 | Watkins-Hayes, C.                                                                     | <i>Race, Respect, and Red Tape: Inside the Black Box of Racially Representative Bureaucracies</i>                    | Passive to Active Representation | Race/Ethnicity                       |
| 2000 | Weiher, G.R.                                                                          | <i>Minority Student Achievement: Passive Representation and Social Context in Schools</i>                            | Passive to Active Representation | Race/Ethnicity                       |

|      |                                  |                                                                                                                                       |                                  |                |
|------|----------------------------------|---------------------------------------------------------------------------------------------------------------------------------------|----------------------------------|----------------|
| 2007 | Wilkins, A.M.                    | <i>Exploring the Causal Story: Gender, Active Representation, and Bureaucratic Priorities</i>                                         | Passive to Active Representation | Gender         |
| 2006 | Wilkins, V.M. and Keiser, L.R.   | <i>Linking Passive to Active Representation by Gender: The Case of Child Support Agencies</i>                                         | Passive to Active Representation | Gender         |
| 2008 | Wilkins, V.M. and Williams, B.N. | <i>Black or Blue: Racial Profiling and Representative Bureaucracy</i>                                                                 | Passive to Active Representation | Race/Ethnicity |
| 2009 | Wilkins, V.M. and Williams, B.N. | <i>Representative Bureaucracy and Racial Profiling in the Latino Community</i>                                                        | Passive to Active Representation | Race/Ethnicity |
| 1997 | Yishai, Y.                       | <i>(Un) representative Bureaucracy Women in Israeli Senior Civil Service.</i>                                                         | Passive Representation           | Gender         |
| 2013 | Zhu, L. and Walker, M. B.L.      | <i>“Too much too young”: race, descriptive representation, and heterogeneous policy responses in the case of teenage childbearing</i> | Passive to Active Representation | Race/Ethnicity |
